# Supplementary material
Source: publisher site journal article supplement (https://www.dovepress.com/article/415098)
Supplement: Supplementary file 1 [file get_supplementary_file.php]

Table S1. Differential operational taxonomic units (OTUs) (PSD vs Sham)

| OTU ID  | Phylum              | Family                                 | Genus                                            | PSD-Mean (%) | PSD-Sd (%) | Sham-Mean (%) | Sham-Sd (%) | P value |
|---------|---------------------|----------------------------------------|--------------------------------------------------|--------------|------------|---------------|-------------|---------|
| OTU570  | p__Bacteroidota     | f__Prevotellaceae                      | g__Prevotellaceae_UCG-001                        | 0.6372       | 0.6163     | 2.329         | 1.663       | 0.041   |
| OTU992  | p__Bacteroidota     | f__Prevotellaceae                      | g__Alloprevotella                                | 2.761        | 2.98       | 0             | 0           | 0.000   |
| OTU551  | p__Bacteroidota     | f__Muribaculaceae                      | g__norank_f__Muribaculaceae                      | 1.56         | 0.4433     | 0.8285        | 0.6768      | 0.031   |
| OTU123  | p__Bacteroidota     | f__Prevotellaceae                      | g__Alloprevotella                                | 0.08687      | 0.1178     | 1.547         | 1.291       | 0.002   |
| OTU1035 | p__Firmicutes       | f__Lachnospiraceae                     | g__Lachnospiraceae_NK4A136_group                 | 1.308        | 1.488      | 0.1388        | 0.1143      | 0.010   |
| OTU110  | p__Bacteroidota     | f__Prevotellaceae                      | g__Prevotellaceae_NK3B31_group                   | 0.02099      | 0.03409    | 1.311         | 1.009       | 0.001   |
| OTU937  | p__Firmicutes       | f__Lachnospiraceae                     | g__unclassified_f__Lachnospiraceae               | 0.07346      | 0.1837     | 1.197         | 2.193       | 0.015   |
| OTU1126 | p__Firmicutes       | f__Ruminococcaceae                     | g__Ruminococcus                                  | 0.249        | 0.6667     | 0.6145        | 0.4553      | 0.023   |
| OTU88   | p__Bacteroidota     | f__Muribaculaceae                      | g__norank_f__Muribaculaceae                      | 0            | 0          | 0.8547        | 1.76        | 0.001   |
| OTU1003 | p__Firmicutes       | f__Oscillospiraceae                    | g__Intestinimonas                                | 0.604        | 0.4386     | 0.232         | 0.1327      | 0.024   |
| OTU621  | p__Firmicutes       | f__norank_o__Clostridia_UCG-014        | g__norank_f__norank_o__Clostridia_UCG-014        | 0.4991       | 0.9219     | 0.05655       | 0.04907     | 0.016   |
| OTU960  | p__Firmicutes       | f__Lachnospiraceae                     | g__Lachnospiraceae_NK4A136_group                 | 0.09503      | 0.08075    | 0.4408        | 0.4151      | 0.040   |
| OTU1138 | p__Actinobacteriota | f__Eggerthellaceae                     | g__Adlercreutzia                                 | 0.3644       | 0.2213     | 0.1038        | 0.1295      | 0.005   |
| OTU458  | p__Bacteroidota     | f__Muribaculaceae                      | g__norank_f__Muribaculaceae                      | 0.4518       | 0.5485     | 0             | 0           | 0.005   |
| OTU254  | p__Firmicutes       | f__Monoglobaceae                       | g__Monoglobus                                    | 0.3475       | 0.2219     | 0.09328       | 0.109       | 0.024   |
| OTU839  | p__Firmicutes       | f__norank_o__Clostridia_UCG-014        | g__norank_f__norank_o__Clostridia_UCG-014        | 0.302        | 0.1557     | 0.1067        | 0.07145     | 0.018   |
| OTU577  | p__Bacteroidota     | f__Muribaculaceae                      | g__norank_f__Muribaculaceae                      | 0.2723       | 0.1721     | 0.1242        | 0.0591      | 0.021   |
| OTU510  | p__Bacteroidota     | f__Rikenellaceae                       | g__Alistipes                                     | 0.3399       | 0.2928     | 0.01982       | 0.03532     | 0.002   |
| OTU507  | p__Bacteroidota     | f__Rikenellaceae                       | g__Alistipes                                     | 0.3142       | 0.1826     | 0.04431       | 0.04854     | 0.003   |
| OTU1063 | p__Bacteroidota     | f__Muribaculaceae                      | g__norank_f__Muribaculaceae                      | 0.08104      | 0.1001     | 0.239         | 0.2517      | 0.040   |
| OTU999  | p__Firmicutes       | f__Ruminococcaceae                     | g__Ruminococcus                                  | 0.001166     | 0.003298   | 0.2705        | 0.553       | 0.039   |
| OTU464  | p__Firmicutes       | f__Lachnospiraceae                     | g__Lachnoclostridium                             | 0.008745     | 0.005252   | 0.2105        | 0.2179      | 0.027   |
| OTU951  | p__Firmicutes       | f__norank_o__Clostridia_UCG-014        | g__norank_f__norank_o__Clostridia_UCG-014        | 0.1685       | 0.1601     | 0.04664       | 0.07269     | 0.018   |
| OTU1130 | p__Bacteroidota     | f__Prevotellaceae                      | g__Prevotellaceae_NK3B31_group                   | 0.2111       | 0.4524     | 0             | 0           | 0.032   |
| OTU77   | p__Firmicutes       | f__Lachnospiraceae                     | g__Blautia                                       | 0.002915     | 0.00554    | 0.1872        | 0.2729      | 0.011   |
| OTU113  | p__Firmicutes       | f__Lachnospiraceae                     | g__Roseburia                                     | 0.002332     | 0.004318   | 0.186         | 0.2125      | 0.004   |
| OTU766  | p__Bacteroidota     | f__Rikenellaceae                       | g__Alistipes                                     | 0.1312       | 0.07937    | 0.05306       | 0.0694      | 0.036   |
| OTU667  | p__Firmicutes       | f__Lachnospiraceae                     | g__Lachnospiraceae_NK4A136_group                 | 0.1667       | 0.1678     | 0.01458       | 0.01605     | 0.011   |
| OTU1093 | p__Firmicutes       | f__Lachnospiraceae                     | g__Butyrivibrio                                  | 0.03032      | 0.05507    | 0.1475        | 0.2108      | 0.025   |
| OTU180  | p__Firmicutes       | f__Lachnospiraceae                     | g__Ruminococcus_torques_group                    | 0            | 0          | 0.1685        | 0.3539      | 0.032   |
| OTU811  | p__Firmicutes       | f__Christensenellaceae                 | g__Christensenellaceae_R-7_group                 | 0.1382       | 0.1533     | 0.01691       | 0.0169      | 0.023   |
| OTU1030 | p__Firmicutes       | f__Oscillospiraceae                    | g__NK4A214_group                                 | 0.1096       | 0.1017     | 0.04023       | 0.02085     | 0.035   |
| OTU28   | p__Bacteroidota     | f__Muribaculaceae                      | g__norank_f__Muribaculaceae                      | 0            | 0          | 0.1306        | 0.1981      | 0.005   |
| OTU94   | p__Firmicutes       | f__Ruminococcaceae                     | g__norank_f__Ruminococcaceae                     | 0.001166     | 0.003298   | 0.1283        | 0.2278      | 0.046   |
| OTU1048 | p__Bacteroidota     | f__Muribaculaceae                      | g__norank_f__Muribaculaceae                      | 0.01691      | 0.01726    | 0.1114        | 0.07874     | 0.004   |
| OTU797  | p__Bacteroidota     | f__Bacteroidaceae                      | g__Bacteroides                                   | 0.1178       | 0.1218     | 0.005247      | 0.007659    | 0.027   |
| OTU521  | p__Actinobacteriota | f__Eggerthellaceae                     | g__Enterorhabdus                                 | 0.07812      | 0.04273    | 0.03207       | 0.02912     | 0.027   |
| OTU492  | p__Actinobacteriota | f__Eggerthellaceae                     | g__Enterorhabdus                                 | 0.08512      | 0.04997    | 0.01341       | 0.01624     | 0.008   |
| OTU57   | p__Firmicutes       | f__Lachnospiraceae                     | g__Anaerostipes                                  | 0.001166     | 0.003298   | 0.09387       | 0.2338      | 0.040   |
| OTU847  | p__Firmicutes       | f__Anaerovoracaceae                    | g__Eubacterium_brachy_group                      | 0.06938      | 0.03283    | 0.02274       | 0.0218      | 0.007   |
| OTU382  | p__Firmicutes       | f__Lachnospiraceae                     | g__Marvinbryantia                                | 0.002915     | 0.00554    | 0.0857        | 0.09532     | 0.025   |
| OTU628  | p__Firmicutes       | f__Eubacterium_coprostanoligenes_group | g__norank_f__Eubacterium_coprostanoligenes_group | 0            | 0          | 0.08512       | 0.1279      | 0.005   |
| OTU915  | p__Firmicutes       | f__Lachnospiraceae                     | g__Lachnospiraceae_NK4A136_group                 | 0.07288      | 0.1513     | 0.008745      | 0.02474     | 0.018   |
| OTU1071 | p__Firmicutes       | f__Peptococcaceae                      | g__norank_f__Peptococcaceae                      | 0.02157      | 0.01364    | 0.06005       | 0.03068     | 0.013   |
| OTU603  | p__Firmicutes       | f__Ruminococcaceae                     | g__Ruminococcus                                  | 0.07579      | 0.1363     | 0.004664      | 0.01319     | 0.021   |
| OTU616  | p__Actinobacteriota | f__Eggerthellaceae                     | g__unclassified_f__Eggerthellaceae               | 0.07696      | 0.06891    | 0.000583      | 0.001649    | 0.001   |
| OTU504  | p__Actinobacteriota | f__Eggerthellaceae                     | g__Enterorhabdus                                 | 0.06646      | 0.08796    | 0.004664      | 0.007884    | 0.027   |
| OTU787  | p__Firmicutes       | f__Christensenellaceae                 | g__Christensenellaceae_R-7_group                 | 0.009328     | 0.02455    | 0.06005       | 0.07945     | 0.007   |
| OTU1101 | p__Actinobacteriota | f__Eggerthellaceae                     | g__Enterorhabdus                                 | 0.06238      | 0.0558     | 0.005247      | 0.002989    | 0.014   |
| OTU1033 | p__Actinobacteriota | f__Eggerthellaceae                     | g__Gordonibacter                                 | 0.05539      | 0.03842    | 0.009328      | 0.008636    | 0.004   |
| OTU501  | p__Actinobacteriota | f__Eggerthellaceae                     | g__unclassified_f__Eggerthellaceae               | 0.05131      | 0.03621    | 0.007579      | 0.007859    | 0.002   |
| OTU477  | p__Firmicutes       | f__Monoglobaceae                       | g__Monoglobus                                    | 0.004664     | 0.01142    | 0.05306       | 0.07404     | 0.043   |
| OTU93   | p__Bacteroidota     | f__Prevotellaceae                      | g__unclassified_f__Prevotellaceae                | 0            | 0          | 0.05306       | 0.08786     | 0.032   |
| OTU802  | p__Firmicutes       | f__Ruminococcaceae                     | g__unclassified_f__Ruminococcaceae               | 0.002915     | 0.004947   | 0.04431       | 0.06482     | 0.022   |
| OTU204  | p__Firmicutes       | f__Erysipelatoclostridiaceae           | g__Erysipelatrichaceae_UCG-003                   | 0            | 0          | 0.04664       | 0.06722     | 0.032   |
| OTU87   | p__Firmicutes       | f__Lachnospiraceae                     | g__norank_f__Lachnospiraceae                     | 0.005247     | 0.008055   | 0.04081       | 0.06276     | 0.037   |
| OTU865  | p__Actinobacteriota | f__Eggerthellaceae                     | g__unclassified_f__Eggerthellaceae               | 0.03032      | 0.01557    | 0.01224       | 0.01431     | 0.023   |
| OTU542  | p__Firmicutes       | f__norank_o__RF39                      | g__norank_f__norank_o__RF39                      | 0.03265      | 0.03894    | 0.008745      | 0.007659    | 0.039   |

|         |                     |                                    |                                              |          |          |          |          |       |
|---------|---------------------|------------------------------------|----------------------------------------------|----------|----------|----------|----------|-------|
| OTU1095 | p__Firmicutes       | f__Lachnospiraceae                 | g__Roseburia                                 | 0        | 0        | 0.03906  | 0.07768  | 0.032 |
| OTU19   | p__Campilobacterota | f__Helicobacteraceae               | g__Helicobacter                              | 0        | 0        | 0.03848  | 0.08066  | 0.032 |
| OTU758  | p__Firmicutes       | f__Anaerovoracaceae                | g__Family_XIII_AD3011_group                  | 0.02915  | 0.01448  | 0.009328 | 0.006107 | 0.002 |
| OTU497  | p__Firmicutes       | f__Oscillospiraceae                | g__unclassified_f__Oscillospiraceae          | 0.03148  | 0.03343  | 0.006996 | 0.009328 | 0.038 |
| OTU661  | p__Firmicutes       | f__Anaerovoracaceae                | g__Eubacterium_brachy_group                  | 0.02624  | 0.01431  | 0.009328 | 0.01557  | 0.013 |
| OTU978  | p__Firmicutes       | f__Christensenellaceae             | g__Christensenellaceae_R-7_group             | 0.02099  | 0.009328 | 0.01049  | 0.008546 | 0.029 |
| OTU761  | p__Firmicutes       | f__Erysipelotrichaceae             | g__Dubosiella                                | 0        | 0        | 0.03148  | 0.05083  | 0.013 |
| OTU874  | p__Firmicutes       | f__Ruminococcaceae                 | g__Candidatus_Soleaferrea                    | 0.02041  | 0.008614 | 0.01049  | 0.006941 | 0.042 |
| OTU1010 | p__Firmicutes       | f__norank_o__RF39                  | g__norank_f__norank_o__RF39                  | 0.02799  | 0.04866  | 0        | 0        | 0.032 |
| OTU146  | p__Firmicutes       | f__Lachnospiraceae                 | g__Blautia                                   | 0        | 0        | 0.02565  | 0.02981  | 0.032 |
| OTU6    | p__Bacteroidota     | f__Muribaculaceae                  | g__norank_f__Muribaculaceae                  | 0        | 0        | 0.02565  | 0.04658  | 0.013 |
| OTU133  | p__Firmicutes       | f__Anaerovoracaceae                | g__Family_XIII_AD3011_group                  | 0.002915 | 0.004947 | 0.02099  | 0.009972 | 0.002 |
| OTU666  | p__Firmicutes       | f__norank_o__RF39                  | g__norank_f__norank_o__RF39                  | 0.02157  | 0.02311  | 0.002332 | 0.002493 | 0.003 |
| OTU854  | p__Firmicutes       | f__Peptococcaceae                  | g__norank_f__Peptococcaceae                  | 0.01691  | 0.01026  | 0.006413 | 0.004273 | 0.012 |
| OTU555  | p__Actinobacteriota | f__Eggerthellaceae                 | g__DNF00809                                  | 0.01866  | 0.01616  | 0.002332 | 0.004986 | 0.004 |
| OTU585  | p__Bacteroidota     | f__Muribaculaceae                  | g__norank_f__Muribaculaceae                  | 0.01982  | 0.01776  | 0        | 0        | 0.001 |
| OTU283  | p__Actinobacteriota | f__Eggerthellaceae                 | g__Enterorhabdus                             | 0.01924  | 0.04168  | 0        | 0        | 0.032 |
| OTU450  | p__Firmicutes       | f__norank_o__Oscillospirales       | g__norank_f__norank_o__Oscillospirales       | 0.01632  | 0.01115  | 0.002915 | 0.00347  | 0.010 |
| OTU278  | p__Firmicutes       | f__Lachnospiraceae                 | g__Lachnospiraceae_UCG-001                   | 0.01516  | 0.0136   | 0.002915 | 0.008245 | 0.028 |
| OTU191  | p__Bacteroidota     | f__Tannerellaceae                  | g__Parabacteroides                           | 0        | 0        | 0.01749  | 0.03434  | 0.032 |
| OTU109  | p__Actinobacteriota | f__Eggerthellaceae                 | g__Enterorhabdus                             | 0.01341  | 0.01127  | 0.002915 | 0.004273 | 0.041 |
| OTU1142 | p__Bacteroidota     | f__Muribaculaceae                  | g__norank_f__Muribaculaceae                  | 0.01632  | 0.01596  | 0        | 0        | 0.001 |
| OTU18   | p__Firmicutes       | f__Monoglobaceae                   | g__Monoglobus                                | 0.000583 | 0.001649 | 0.01516  | 0.03361  | 0.044 |
| OTU47   | p__Firmicutes       | f__Oscillospiraceae                | g__norank_f__Oscillospiraceae                | 0.002332 | 0.003526 | 0.01341  | 0.009139 | 0.004 |
| OTU669  | p__Firmicutes       | f__norank_o__RF39                  | g__norank_f__norank_o__RF39                  | 0.01574  | 0.02696  | 0        | 0        | 0.013 |
| OTU737  | p__Firmicutes       | f__Oscillospiraceae                | g__UCG-005                                   | 0.003498 | 0.009894 | 0.01224  | 0.01474  | 0.042 |
| OTU948  | p__Deferribacterota | f__Deferribacteraceae              | g__Mucispirillum                             | 0.01224  | 0.007859 | 0.002915 | 0.00347  | 0.018 |
| OTU260  | p__Actinobacteriota | f__Eggerthellaceae                 | g__Enterorhabdus                             | 0.01224  | 0.009308 | 0.002915 | 0.004947 | 0.048 |
| OTU185  | p__Firmicutes       | f__Oscillospiraceae                | g__UCG-005                                   | 0.002915 | 0.004947 | 0.01166  | 0.008989 | 0.028 |
| OTU104  | p__Firmicutes       | f__UCG-010                         | g__norank_f__UCG-010                         | 0        | 0        | 0.01399  | 0.009972 | 0.001 |
| OTU509  | p__Firmicutes       | f__Ruminococcaceae                 | g__norank_f__Ruminococcaceae                 | 0.001749 | 0.002414 | 0.01049  | 0.01136  | 0.011 |
| OTU777  | p__Proteobacteria   | f__norank_o__Rhodospirillales      | g__norank_f__norank_o__Rhodospirillales      | 0.01166  | 0.01271  | 0        | 0        | 0.013 |
| OTU841  | p__Firmicutes       | f__norank_o__norank_c__Clostridia  | g__norank_f__norank_o__norank_c__Clostridia  | 0.01049  | 0.01108  | 0.000583 | 0.001649 | 0.034 |
| OTU478  | p__Firmicutes       | f__norank_o__norank_c__Clostridia  | g__norank_f__norank_o__norank_c__Clostridia  | 0.008745 | 0.009796 | 0.001166 | 0.002159 | 0.035 |
| OTU346  | p__Actinobacteriota | f__Eggerthellaceae                 | g__Enterorhabdus                             | 0.009911 | 0.01329  | 0        | 0        | 0.032 |
| OTU545  | p__Firmicutes       | f__Erysipelatoclostridiaceae       | g__Candidatus_Stoquefichus                   | 0        | 0        | 0.008745 | 0.01257  | 0.013 |
| OTU193  | p__Firmicutes       | f__Erysipelatoclostridiaceae       | g__Erysipelatoclostridium                    | 0        | 0        | 0.008162 | 0.01163  | 0.032 |
| OTU827  | p__Actinobacteriota | f__Eggerthellaceae                 | g__Parvibacter                               | 0.008162 | 0.01108  | 0        | 0        | 0.013 |
| OTU206  | p__Firmicutes       | f__Anaerofustaceae                 | g__Anaerofustis                              | 0.006996 | 0.004986 | 0.001166 | 0.002159 | 0.011 |
| OTU91   | p__Elusimicrobiota  | f__Elusimicrobiaceae               | g__Elusimicrobium                            | 0        | 0        | 0.007579 | 0.009308 | 0.012 |
| OTU579  | p__Firmicutes       | f__Christensenellaceae             | g__Christensenellaceae_R-7_group             | 0.006413 | 0.00347  | 0.000583 | 0.001649 | 0.004 |
| OTU270  | p__Actinobacteriota | f__Coriobacteriales_Incertae_Sedis | g__norank_f__Coriobacteriales_Incertae_Sedis | 0.005247 | 0.006326 | 0        | 0        | 0.012 |
| OTU1066 | p__Firmicutes       | f__Lachnospiraceae                 | g__norank_f__Lachnospiraceae                 | 0.000583 | 0.001649 | 0.004081 | 0.003892 | 0.044 |
| OTU490  | p__Actinobacteriota | f__Actinomycetaceae                | g__Actinomycetes                             | 0.004664 | 0.006596 | 0        | 0        | 0.032 |
| OTU453  | p__Firmicutes       | f__Ruminococcaceae                 | g__Paludicola                                | 0.004664 | 0.006596 | 0        | 0        | 0.032 |
| OTU117  | p__Firmicutes       | f__UCG-010                         | g__norank_f__UCG-010                         | 0        | 0        | 0.004081 | 0.004622 | 0.012 |
| OTU1100 | p__Firmicutes       | f__Lachnospiraceae                 | g__Acetatifactor                             | 0.003498 | 0.004134 | 0        | 0        | 0.032 |
| OTU823  | p__Firmicutes       | f__Lachnospiraceae                 | g__Lachnospiraceae_ND3007_group              | 0        | 0        | 0.002915 | 0.00347  | 0.032 |
| OTU749  | p__Firmicutes       | f__Lachnospiraceae                 | g__unclassified_f__Lachnospiraceae           | 0        | 0        | 0.002915 | 0.00347  | 0.032 |
| OTU81   | p__Firmicutes       | f__Lachnospiraceae                 | g__GCA-900066575                             | 0.002332 | 0.002493 | 0        | 0        | 0.030 |

Table S2. Differential operational taxonomic units (OTUs) (EA vs PSD)

| OUT ID  | Phylum              | Family                                  | Genus                                             | EA-Mean(%) | EA-Sd(%) | PSD-Mean(%) | PSD-Sd(%) | P value |
|---------|---------------------|-----------------------------------------|---------------------------------------------------|------------|----------|-------------|-----------|---------|
| OTU976  | p__Bacteroidota     | f__Muribaculaceae                       | g__norank_f__Muribaculaceae                       | 0.8705     | 1.275    | 0.02857     | 0.06857   | 0.018   |
| OTU518  | p__Firmicutes       | f__Monoglobaceae                        | g__Monoglobus                                     | 0.4612     | 0.3296   | 0.1417      | 0.1214    | 0.014   |
| OTU415  | p__Firmicutes       | f__Lachnospiraceae                      | g__unclassified_f__Lachnospiraceae                | 0.4099     | 0.394    | 0.1154      | 0.2543    | 0.030   |
| OTU1138 | p__Actinobacteriota | f__Eggerthellaceae                      | g__Adlercreutzia                                  | 0.1149     | 0.1058   | 0.3644      | 0.2213    | 0.007   |
| OTU893  | p__Firmicutes       | f__Lachnospiraceae                      | g__Eubacterium_ruminantium_group                  | 0.3737     | 0.4893   | 0.04722     | 0.09104   | 0.034   |
| OTU507  | p__Bacteroidota     | f__Rikenellaceae                        | g__Alistipes                                      | 0.1038     | 0.1051   | 0.3142      | 0.1826    | 0.014   |
| OTU1110 | p__Bacteroidota     | f__Bacteroidaceae                       | g__Bacteroides                                    | 0.07346    | 0.03771  | 0.1638      | 0.07031   | 0.006   |
| OTU1130 | p__Bacteroidota     | f__Prevotellaceae                       | g__Prevotellaceae_NK3B31_group                    | 0          | 0        | 0.2111      | 0.4524    | 0.032   |
| OTU789  | p__Bacteroidota     | f__Prevotellaceae                       | g__Alloprevotella                                 | 0.1528     | 0.3429   | 0           | 0         | 0.005   |
| OTU555  | p__Actinobacteriota | f__Eggerthellaceae                      | g__DNF00809                                       | 0.1049     | 0.08265  | 0.01866     | 0.01616   | 0.002   |
| OTU305  | p__Bacteroidota     | f__Rikenellaceae                        | g__Alistipes                                      | 0.02041    | 0.0297   | 0.08454     | 0.07253   | 0.033   |
| OTU492  | p__Actinobacteriota | f__Eggerthellaceae                      | g__Enterorhabdus                                  | 0.01982    | 0.009894 | 0.08512     | 0.04997   | 0.010   |
| OTU879  | p__Firmicutes       | f__Lachnospiraceae                      | g__norank_f__Lachnospiraceae                      | 0.08512    | 0.08974  | 0.009911    | 0.01154   | 0.010   |
| OTU123  | p__Bacteroidota     | f__Prevotellaceae                       | g__Alloprevotella                                 | 0.003498   | 0.009894 | 0.08687     | 0.1178    | 0.013   |
| OTU1071 | p__Firmicutes       | f__Peptococcaceae                       | g__norank_f__Peptococcaceae                       | 0.06122    | 0.0269   | 0.02157     | 0.01364   | 0.010   |
| OTU616  | p__Actinobacteriota | f__Eggerthellaceae                      | g__unclassified_f__Eggerthellaceae                | 0.004664   | 0.008269 | 0.07696     | 0.06891   | 0.003   |
| OTU501  | p__Actinobacteriota | f__Eggerthellaceae                      | g__unclassified_f__Eggerthellaceae                | 0.02507    | 0.03372  | 0.05131     | 0.03621   | 0.035   |
| OTU1033 | p__Actinobacteriota | f__Eggerthellaceae                      | g__Gordonibacter                                  | 0.01807    | 0.01071  | 0.05539     | 0.03842   | 0.048   |
| OTU1043 | p__Bacteroidota     | f__Bacteroidaceae                       | g__Bacteroides                                    | 0.01166    | 0.0213   | 0.05947     | 0.05545   | 0.019   |
| OTU472  | p__Bacteroidota     | f__Rikenellaceae                        | g__Alistipes                                      | 0.001166   | 0.003298 | 0.06472     | 0.08073   | 0.013   |
| OTU382  | p__Firmicutes       | f__Lachnospiraceae                      | g__Marvinbryantia                                 | 0.05597    | 0.06337  | 0.002915    | 0.00554   | 0.049   |
| OTU812  | p__Desulfobacterota | f__Desulfovibrionaceae                  | g__Bilophila                                      | 0.03906    | 0.03934  | 0.005247    | 0.01127   | 0.017   |
| OTU865  | p__Actinobacteriota | f__Eggerthellaceae                      | g__unclassified_f__Eggerthellaceae                | 0.01108    | 0.00554  | 0.03032     | 0.01557   | 0.014   |
| OTU1052 | p__Firmicutes       | f__Ruminococcaceae                      | g__Negativibacillus                               | 0.01166    | 0.01537  | 0.02915     | 0.01943   | 0.029   |
| OTU661  | p__Firmicutes       | f__Anaerovoracaceae                     | g__Eubacterium_brachy_group                       | 0.01166    | 0.01087  | 0.02624     | 0.01431   | 0.039   |
| OTU457  | p__Firmicutes       | f__Christensenellaceae                  | g__unclassified_f__Christensenellaceae            | 0.03673    | 0.02954  | 0           | 0         | 0.001   |
| OTU946  | p__Firmicutes       | f__Lachnospiraceae                      | g__Lachnospiraceae_NK4A136_group                  | 0.009328   | 0.02101  | 0.0239      | 0.0241    | 0.046   |
| OTU480  | p__Firmicutes       | f__Ruminococcaceae                      | g__norank_f__Ruminococcaceae                      | 0.02915    | 0.0244   | 0.002915    | 0.006567  | 0.010   |
| OTU634  | p__Firmicutes       | f__Lachnospiraceae                      | g__norank_f__Lachnospiraceae                      | 0.02449    | 0.0217   | 0.006996    | 0.01087   | 0.032   |
| OTU626  | p__Bacteroidota     | f__Marinifilaceae                       | g__Odoribacter                                    | 0.03148    | 0.03979  | 0           | 0         | 0.013   |
| OTU289  | p__Desulfobacterota | f__Desulfovibrionaceae                  | g__norank_f__Desulfovibrionaceae                  | 0.003498   | 0.009894 | 0.0274      | 0.03245   | 0.028   |
| OTU978  | p__Firmicutes       | f__Christensenellaceae                  | g__Christensenellaceae_R-7_group                  | 0.009328   | 0.01142  | 0.02099     | 0.009328  | 0.029   |
| OTU972  | p__Proteobacteria   | f__norank_o__Rhodospirillales           | g__norank_f__norank_o__Rhodospirillales           | 0.002332   | 0.002493 | 0.02332     | 0.03074   | 0.034   |
| OTU974  | p__Firmicutes       | f__Oscillospiraceae                     | g__unclassified_f__Oscillospiraceae               | 0.01749    | 0.0102   | 0.00583     | 0.006941  | 0.033   |
| OTU645  | p__Firmicutes       | f__Butyricocccaceae                     | g__Butyricoccus                                   | 0.01749    | 0.01189  | 0.00583     | 0.006941  | 0.042   |
| OTU135  | p__Bacteroidota     | f__Muribaculaceae                       | g__norank_f__Muribaculaceae                       | 0.004664   | 0.01319  | 0.01574     | 0.01865   | 0.032   |
| OTU283  | p__Actinobacteriota | f__Eggerthellaceae                      | g__Enterorhabdus                                  | 0          | 0        | 0.01924     | 0.04168   | 0.032   |
| OTU605  | p__Firmicutes       | f__UCG-010                              | g__norank_f__UCG-010                              | 0.01341    | 0.01041  | 0.004081    | 0.006799  | 0.027   |
| OTU22   | p__Firmicutes       | f__norank_o__Clostridia_vadinBB60_group | g__norank_f__norank_o__Clostridia_vadinBB60_group | 0          | 0        | 0.01516     | 0.03219   | 0.032   |
| OTU999  | p__Firmicutes       | f__Ruminococcaceae                      | g__Ruminococcus                                   | 0.01399    | 0.02188  | 0.001166    | 0.003298  | 0.046   |
| OTU109  | p__Actinobacteriota | f__Eggerthellaceae                      | g__Enterorhabdus                                  | 0.001166   | 0.002159 | 0.01341     | 0.01127   | 0.016   |
| OTU260  | p__Actinobacteriota | f__Eggerthellaceae                      | g__Enterorhabdus                                  | 0          | 0        | 0.01224     | 0.009308  | 0.004   |
| OTU676  | p__Firmicutes       | f__Lachnospiraceae                      | g__norank_f__Lachnospiraceae                      | 0.01224    | 0.01831  | 0           | 0         | 0.013   |
| OTU102  | p__Actinobacteriota | f__Eggerthellaceae                      | g__Enterorhabdus                                  | 0.000583   | 0.001649 | 0.01108     | 0.008245  | 0.009   |
| OTU117  | p__Firmicutes       | f__UCG-010                              | g__norank_f__UCG-010                              | 0.009911   | 0.0142   | 0           | 0         | 0.013   |
| OTU508  | p__Firmicutes       | f__norank_o__Clostridia_UCG-014         | g__norank_f__norank_o__Clostridia_UCG-014         | 0.001166   | 0.003298 | 0.007579    | 0.007453  | 0.046   |
| OTU103  | p__Actinobacteriota | f__Eggerthellaceae                      | g__unclassified_f__Eggerthellaceae                | 0.000583   | 0.001649 | 0.006413    | 0.006075  | 0.034   |
| OTU899  | p__Firmicutes       | f__Lachnospiraceae                      | g__unclassified_f__Lachnospiraceae                | 0.006996   | 0.007884 | 0           | 0         | 0.013   |
| OTU256  | p__Firmicutes       | f__UCG-010                              | g__norank_f__UCG-010                              | 0.000583   | 0.001649 | 0.00583     | 0.009245  | 0.049   |
| OTU694  | p__Firmicutes       | f__norank_o__RF39                       | g__norank_f__norank_o__RF39                       | 0.003498   | 0.004134 | 0           | 0         | 0.032   |
| OTU155  | p__Bacteroidota     | f__Marinifilaceae                       | g__Odoribacter                                    | 0          | 0        | 0.003498    | 0.004134  | 0.032   |
| OTU257  | p__Firmicutes       | f__Ruminococcaceae                      | g__norank_f__Ruminococcaceae                      | 0          | 0        | 0.002915    | 0.00347   | 0.032   |

Table S3. Discriminative fecal metabolites (PSD vs Sham)

| Metabolite name                                                                                                                  | FC(PSD/Sham) | Up/down regulation |
|----------------------------------------------------------------------------------------------------------------------------------|--------------|--------------------|
| 11alpha-(chloromethyl)-1alpha,25-dihydroxyvitamin D3                                                                             | 1.31         | ↑                  |
| 12a-Hydroxy-3-oxocholadienic acid                                                                                                | 1.15         | ↑                  |
| (ent-16betaOH)-16,17-Dihydroxy-9(11)-kauren-19-oic acid                                                                          | 1.14         | ↑                  |
| 5',8-Dihydroxy-3',4',7-trimethoxyflavan                                                                                          | 1.13         | ↑                  |
| (-)-Folicanthine                                                                                                                 | 1.12         | ↑                  |
| (ent-6alpha,7alpha,12alpha)-6,7,12-Trihydroxy-16-kauren-19-oic acid                                                              | 1.12         | ↑                  |
| Diketopiperazine derivative of Quinaprilat                                                                                       | 1.11         | ↑                  |
| 3-Indoleacetic Acid                                                                                                              | 1.09         | ↑                  |
| PC(20:4/0:0)                                                                                                                     | 1.07         | ↑                  |
| 11-Dodecenoic acid                                                                                                               | 1.07         | ↑                  |
| Kojibiose                                                                                                                        | 1.06         | ↑                  |
| (12S,15S)-15-O-Demethyl-10,29-dideoxy-11,12-dihydro-striatin C                                                                   | 1.06         | ↑                  |
| 3b-Hydroxy-5-cholenic acid                                                                                                       | 1.06         | ↑                  |
| Ricinoleic Acid methyl ester                                                                                                     | 0.94         | ↓                  |
| ADMA                                                                                                                             | 0.92         | ↓                  |
| Thr Cys Asn Glu                                                                                                                  | 0.92         | ↓                  |
| (S)-b-aminoisobutyric acid                                                                                                       | 0.92         | ↓                  |
| Asteltoxin                                                                                                                       | 0.92         | ↓                  |
| Trichocarposide                                                                                                                  | 0.91         | ↓                  |
| Gamma-Hydroxyphenylbutazone                                                                                                      | 0.89         | ↓                  |
| COUMARINIC ACID METHYL ETHER                                                                                                     | 0.86         | ↓                  |
| N-Acetylputrescine                                                                                                               | 0.85         | ↓                  |
| Citric acid                                                                                                                      | 0.85         | ↓                  |
| (+/-)-Aegeline                                                                                                                   | 0.82         | ↓                  |
| Malvidin                                                                                                                         | 0.81         | ↓                  |
| 4-p-Coumaroyl-1,5-quinolactone                                                                                                   | 0.81         | ↓                  |
| 5,7-dihydroxy-2-(1-hydroxy-3,5-dimethoxy-4-oxocyclohex-2-en-1-yl)-4H-chromen-4-one                                               | 0.80         | ↓                  |
| Cis-Resveratrol 3-O-glucuronide                                                                                                  | 0.80         | ↓                  |
| Estradiol                                                                                                                        | 0.77         | ↓                  |
| Adenosine diphosphate ribose                                                                                                     | 0.72         | ↓                  |
| 20-Hydroxy-leukotriene E4                                                                                                        | 0.70         | ↓                  |
| 2-Hydroxyestradiol                                                                                                               | 0.66         | ↓                  |
| 3,4,5-trihydroxy-6-(3-hydroxy-4-[(E)-2-[2,3,5-trihydroxy-4-(3-methylbut-2-en-1-yl)phenyl]ethenyl]phenoxy)oxane-2-carboxylic acid | 0.66         | ↓                  |
| 2-(2-Aminoethyl)indole                                                                                                           | 0.65         | ↓                  |

Table S4. Discriminative fecal metabolites (EA vs PSD)

| Metabolite name                                                                                                                                 | FC(EA/PSD) | Up/down regulation |
|-------------------------------------------------------------------------------------------------------------------------------------------------|------------|--------------------|
| 3-Methylthiopropylamine                                                                                                                         | 2.24       | ↑                  |
| 2-amino-4-([1-[(carboxymethyl)-C-hydroxycarbonimidoyl]-2-[[1-(2-hydroxyphenyl)-3-oxopropyl]sulfanyl]ethyl]-C-hydroxycarbonimidoyl)butanoic acid | 1.84       | ↑                  |
| Cis-2,3-Dimethylthiirane                                                                                                                        | 1.55       | ↑                  |
| Melledonal C                                                                                                                                    | 1.44       | ↑                  |
| N1,N12-Diacetylspermine                                                                                                                         | 1.14       | ↑                  |
| Salpha-Pregnan-20alpha-ol-3-one                                                                                                                 | 1.11       | ↑                  |
| Valyl-Isoleucine                                                                                                                                | 1.09       | ↑                  |
| Ile Phe                                                                                                                                         | 1.09       | ↑                  |
| Safynol                                                                                                                                         | 1.08       | ↑                  |
| ADMA                                                                                                                                            | 1.08       | ↑                  |
| 5-Methoxytryptophol                                                                                                                             | 1.08       | ↑                  |
| SECURININE                                                                                                                                      | 1.07       | ↑                  |
| N,O-Didesmethylvenlafaxine                                                                                                                      | 1.07       | ↑                  |
| Alpha-Pyrrolidinopentiophenone                                                                                                                  | 1.06       | ↑                  |
| COTARNINE                                                                                                                                       | 1.06       | ↑                  |
| (R)-Sulcatol                                                                                                                                    | 1.05       | ↑                  |
| 1-Pyrroline-5-carboxylic acid                                                                                                                   | 1.04       | ↑                  |
| Acetylcholine                                                                                                                                   | 1.04       | ↑                  |
| Citrulline                                                                                                                                      | 1.04       | ↑                  |
| L-Glutamate                                                                                                                                     | 1.04       | ↑                  |
| Aminoethoxyacetic acid                                                                                                                          | 1.04       | ↑                  |
| 4-Methylene-L-glutamine                                                                                                                         | 1.04       | ↑                  |
| 11-peroxy-5Z,8Z,12E,14Z-eicosatetraenoate                                                                                                       | 0.96       | ↓                  |
| Yucalexin B22                                                                                                                                   | 0.96       | ↓                  |
| Arnidenediol                                                                                                                                    | 0.94       | ↓                  |
| Cardanolmonoene                                                                                                                                 | 0.94       | ↓                  |
| PC(20:4(0:0))                                                                                                                                   | 0.93       | ↓                  |
| Diketopiperazine derivative of Quinaprilat                                                                                                      | 0.93       | ↓                  |
| 10-Hydroxymelleotide                                                                                                                            | 0.93       | ↓                  |
| 21-hydroxyallopregnanolone                                                                                                                      | 0.92       | ↓                  |
| 5,20-DiHETE                                                                                                                                     | 0.92       | ↓                  |
| Salpha-pregnane-3,20-dione                                                                                                                      | 0.92       | ↓                  |
| TetraHCA                                                                                                                                        | 0.92       | ↓                  |
| 1b-Hydroxycholic acid                                                                                                                           | 0.92       | ↓                  |
| (ent-16betaOH)-16,17-Dihydroxy-9(11)-kauren-19-oic acid                                                                                         | 0.92       | ↓                  |
| LysoPC(20:4(5Z,8Z,11Z,14Z))                                                                                                                     | 0.90       | ↓                  |
| Deoxyguanosine                                                                                                                                  | 0.89       | ↓                  |
| Deuteroporphyrin IX                                                                                                                             | 0.87       | ↓                  |
| 4-Vinylphenol sulfate                                                                                                                           | 0.82       | ↓                  |
| Isobutyl 2-furanpropionate                                                                                                                      | 0.69       | ↓                  |

Table S5. KEGG pathway analysis (PSD vs Sham)

| Pathway ID | Pathway Description                               | Enriched Metabolites | P value |
|------------|---------------------------------------------------|----------------------|---------|
| map04913   | Ovarian steroidogenesis                           | 2                    | 0.015   |
| map00140   | Steroid hormone biosynthesis                      | 2                    | 0.037   |
| map01070   | Biosynthesis of plant hormones                    | 2                    | 0.041   |
| map05208   | Chemical carcinogenesis - reactive oxygen species | 2                    | 0.044   |
| map05224   | Breast cancer                                     | 1                    | 0.038   |
| map04929   | GnRH secretion                                    | 1                    | 0.045   |
| map04075   | Plant hormone signal transduction                 | 1                    | 0.046   |
| map05215   | Prostate cancer                                   | 1                    | 0.050   |
| map04917   | Prolactin signaling pathway                       | 1                    | 0.050   |

Table S6. KEGG pathway analysis (EA vs PSD)

| Pathway ID | Pathway Description                                    | Enriched Metabolites | P value |
|------------|--------------------------------------------------------|----------------------|---------|
| map00140   | Steroid hormone biosynthesis                           | 3                    | 0.008   |
| map05033   | Nicotine addiction                                     | 2                    | 0.003   |
| map04721   | Synaptic vesicle cycle                                 | 2                    | 0.004   |
| map00660   | C5-Branched dibasic acid metabolism                    | 2                    | 0.008   |
| map00220   | Arginine biosynthesis                                  | 2                    | 0.008   |
| map00250   | Alanine, aspartate and glutamate metabolism            | 2                    | 0.010   |
| map04742   | Taste transduction                                     | 2                    | 0.011   |
| map00332   | Carbapenem biosynthesis                                | 2                    | 0.011   |
| map05022   | Pathways of neurodegeneration - multiple diseases      | 2                    | 0.011   |
| map04080   | Neuroactive ligand-receptor interaction                | 2                    | 0.017   |
| map00997   | Biosynthesis of various secondary metabolites - part 3 | 2                    | 0.017   |
| map00564   | Glycerophospholipid metabolism                         | 2                    | 0.017   |
| map00330   | Arginine and proline metabolism                        | 2                    | 0.028   |
| map02010   | ABC transporters                                       | 2                    | 0.035   |
| map04810   | Regulation of actin cytoskeleton                       | 1                    | 0.032   |
| map04068   | FoxO signaling pathway                                 | 1                    | 0.032   |
| map05016   | Huntington disease                                     | 1                    | 0.034   |
| map05034   | Alcoholism                                             | 1                    | 0.036   |
| map04724   | Glutamatergic synapse                                  | 1                    | 0.036   |
| map04720   | Long-term potentiation                                 | 1                    | 0.037   |
| map05017   | Spinocerebellar ataxia                                 | 1                    | 0.037   |
| map05030   | Cocaine addiction                                      | 1                    | 0.037   |
| map04911   | Insulin secretion                                      | 1                    | 0.037   |
| map04725   | Cholinergic synapse                                    | 1                    | 0.037   |
| map04072   | Phospholipase D signaling pathway                      | 1                    | 0.038   |
| map05231   | Choline metabolism in cancer                           | 1                    | 0.038   |
| map04540   | Gap junction                                           | 1                    | 0.038   |
| map04730   | Long-term depression                                   | 1                    | 0.038   |
| map04727   | GABAergic synapse                                      | 1                    | 0.038   |
| map05031   | Amphetamine addiction                                  | 1                    | 0.038   |
| map04713   | Circadian entrainment                                  | 1                    | 0.038   |
| map05014   | Amyotrophic lateral sclerosis                          | 1                    | 0.039   |
| map04971   | Gastric acid secretion                                 | 1                    | 0.039   |
| map04972   | Pancreatic secretion                                   | 1                    | 0.039   |
| map04964   | Proximal tubule bicarbonate reclamation                | 1                    | 0.043   |
| map04970   | Salivary secretion                                     | 1                    | 0.043   |
| map00910   | Nitrogen metabolism                                    | 1                    | 0.046   |
| map04723   | Retrograde endocannabinoid signaling                   | 1                    | 0.046   |
